# Supplementary material
Source: PubMed Central journal article supplement (PMC4070524)
Supplement: NIHMS547262-supplement-Supplemental_data.pdf [file NIHMS547262-supplement-Supplemental_data.pdf]

## Supplementary Tables

**Table S1: Demographic data**

|                               | Control      | Heroin       |
|-------------------------------|--------------|--------------|
| <b>Number</b>                 | N=30         | N=39         |
| <b>Age (yrs)</b>              | 33.23 ± 2.32 | 26.54 ± 0.89 |
| <b>Race</b>                   | Caucasian    | Caucasian    |
| <b>Gender</b>                 | F=5, M=25    | F=6, M=33    |
| <b>PMI</b>                    | <24 hours    | <24 hours    |
| <b>Brain pH</b>               | 6.73 ± .04   | 6.57 ± .03   |
| <b>Ethanol toxicology</b>     | 3            | 4            |
| <b>Morphine (ug/ul) urine</b> | 0            | 3.89 ± 1.61  |
| <b>6-MAM (ug/ml) urine</b>    | 0            | 0.38 ± 0.11  |

**Table S2: Probes used with Nanostring technologies.**

| Symbol       | Full name                                    | Accession # | Target region | Sequence                                                                                                     |
|--------------|----------------------------------------------|-------------|---------------|--------------------------------------------------------------------------------------------------------------|
| <i>ACTB</i>  | Actin, beta                                  | NM_001101.2 | 1010-1110     | TGCAGAAGGAGATCACTGCCCTGGCACCCAGCAC<br>AATGAAGATCAAGATCATTGCTCCTCCTGAGCGC<br>AAGTACTCCGTGTGGATCGGCGGCTCCATCCT |
| <i>BAG1</i>  | BCL2-associated<br>athanogene                | NM_004323.3 | 1490-1590     | CTCTTGATCGTGTAGTCCCATAGCTGTAAAACC<br>AGAATCACCAGGAGGTTGCACCTAGTCAGGAATA<br>TTGGGAATGGCCTAGAACAAGGTGTTGGCA    |
| <i>ELK1</i>  | ETS oncogene homolog                         | NM_005229.3 | 2350-2450     | TTTTCAATAGGGGAGAGGGAGTCATCTTCTCTAT<br>ATTTGGTGGGGTGGGTGGGAAGGAAGGGATTTG<br>GGGGGAATCTTCTGCCCTCCCCACTCC       |
| <i>GAPDH</i> | Glyceraldehyde-3-<br>phosphate dehydrogenase | NM_002046.3 | 35-135        | TCCTCCTGTTGACAGTCAGCCGCATCTTCTTTGC<br>GTCGCCAGCCGAGCCACATCGCTCAGACACCATG<br>GGGAAGGTGAAGGTGGAGTCAACGGATT     |
| <i>USE1</i>  | Unconventional SNARE in<br>the ER 1 homolog  | NM_018467.3 | 160-260       | AGTACGTGGGAGCCCTAGAGGACATGTTGCAGG<br>CCCTGAAGGTCCACGCGAGCAAACCGGCTCTGA<br>GGTGATCAATGAATATTCTGGAAGGTGGATT    |

**Table S3- Primer pair sequences used in qPCR.**

| Symbol      | Full name                                | Accession # | Distance from TSS | Sequence                                                              |
|-------------|------------------------------------------|-------------|-------------------|-----------------------------------------------------------------------|
| <i>Bag1</i> | BCL2-associated athanogene               | NM_004323.3 | -0.7kb            | FWD 5'- AGCTCTTCCGCTGCCCACTGT-3'<br>REV 5'-GACGAAAGGGGGCGTAGTGACCT-3' |
|             |                                          |             | -0.1kb            | FWD 5'-AGGATAGGGCGGTGCCTTGG-3'<br>REV 5'-TACTCGCCACGCCCTCGGAA-3'      |
|             |                                          |             | +0.2kb            | FWD 5'-GAGCCCGTGACCTTCCATGC-3'<br>REV 5'-AATTCAGGGCCCCCAGGACA-3'      |
| <i>Use1</i> | Unconventional SNARE in the ER 1 homolog | NM_018467.3 | -0.3kb            | FWD 5'- AACCTCCAGCAGGGCAGCCTA-3'<br>REV 5'-CGAGGGCCTGTGCTCAAATCTC-3'  |
|             |                                          |             | +0.2kb            | FWD 5'- ATGTCAGGGCTCCCGCCTCA-3'<br>REV 5'-ACTGGACGGCAGGACCGGAA-3'     |
|             |                                          |             | +0.1kb            | FWD 5'- ATTCGGCCCCTGGCGTGACA-3'<br>REV 5'-TGGGAACCGCAGCCCCAGAA-3'     |

**Table S4: Frequency of the rs2075572 *OPRM1* polymorphism in human subjects.**

| rs2075572      | C/C   | C/G   | G/G   |
|----------------|-------|-------|-------|
| <b>Control</b> | 0.455 | 0.364 | 0.182 |
| <b>Heroin</b>  | 0.250 | 0.469 | 0.281 |

**Table S5: ELK1 target genes identified in 49 subjects.**

| <b>ETS1 (1589 genes)</b>      | <b>ELK1 (2282 genes)</b>      |
|-------------------------------|-------------------------------|
| <b>p value: 2.14E-03</b>      | <b>p value: 1.74E-02</b>      |
| <b>Overlapping genes (29)</b> | <b>Overlapping genes (36)</b> |
| ACOT8                         | ACOT8                         |
| ARFGAP1                       | ADRM1                         |
| ARL6IP4                       | ARFGAP1                       |
| ASPSCR1                       | ARL6IP4                       |
| AURKAIP1                      | ASPSCR1                       |
| BCAP31                        | AURKAIP1                      |
| C11ORF2                       | BAG1                          |
| C12ORF44                      | C11ORF2                       |
| C17ORF62                      | C1QB                          |
| EIF3G                         | DNAJB2                        |
| ERCC1                         | ECSIT                         |
| FIBP                          | EIF3G                         |
| FIS1                          | EMG1                          |
| GPAA1                         | ERCC1                         |
| KLHDC4                        | FIBP                          |
| MFSD5                         | GPAA1                         |
| MYL6B                         | MRPL28                        |
| NME2                          | MYL6B                         |
| NOSIP                         | NDUFV1                        |
| NR1H3                         | NOSIP                         |
| NTHL1                         | NR1H3                         |
| PACS2                         | NTHL1                         |
| PAF1                          | PAF1                          |
| PIH1D1                        | PIGT                          |
| PUF60                         | PIH1D1                        |
| SCAND1                        | PRMT7                         |
| TSSC4                         | PTMA                          |
| UXT                           | PUF60                         |
| ZNF593                        | RFXANK                        |
|                               | SEC13                         |
|                               | SMARCD2                       |
|                               | TMEM204                       |
|                               | TSSC4                         |
|                               | USE1                          |
|                               | UXT                           |
|                               | ZNF593                        |

**Table S6: ELK1 target genes identified in 32 subjects.**

| ETS1 (1589 genes)       |         |        | ELK1 (2282 genes)        |         |         |
|-------------------------|---------|--------|--------------------------|---------|---------|
| <i>p</i> value: 5.7E-09 |         |        | <i>p</i> value: 2.26E-07 |         |         |
| Overlapping genes (91)  |         |        | Overlapping genes (115)  |         |         |
| ACOT8                   | MYL6B   | WDR74  | ACOT8                    | MPG     | SEC13   |
| ACP2                    | NECAP2  | XAB2   | ACP2                     | MRPL28  | SEC24C  |
| ARFGAP1                 | NISCH   | YKT6   | ADRM1                    | MRPL52  | SF3A3   |
| ARL6IP4                 | NME2    | ZBTB48 | ARFGAP1                  | MRPS18B | SF3B2   |
| ASB1                    | NOSIP   | ZNF408 | ARL6IP4                  | MVP     | SLC27A5 |
| ASPSCR1                 | NR1H3   | ZNF593 | ASB1                     | MYL5    | SLC9A8  |
| ATG9A                   | NTHL1   | ZNF768 | ASPSCR1                  | MYL6B   | SMARCD2 |
| ATP5I                   | PACS2   |        | ATG9A                    | NDUFV1  | SNF8    |
| AURKAIP1                | PAF1    |        | ATP5I                    | NECAP2  | STK19   |
| B3GAT3                  | PEX16   |        | AURKAIP1                 | NISCH   | STOML1  |
| BCAP31                  | PIH1D1  |        | B3GAT3                   | NOSIP   | STX4    |
| C11ORF2                 | PNKP    |        | BAG1                     | NR1H3   | SUPT5H  |
| C11ORF51                | POLL    |        | BAP1                     | NSUN5   | TARS2   |
| C12ORF44                | POLR2G  |        | C11ORF10                 | NTHL1   | TIMM10  |
| C16ORF7                 | POP4    |        | C11ORF2                  | NUDC    | TMED3   |
| C17ORF62                | PPIE    |        | C11ORF51                 | PAF1    | TMEM204 |
| C20ORF43                | PPP4C   |        | C16ORF7                  | PIGT    | TOLLIP  |
| CARS                    | PRPF19  |        | C1QB                     | PIH1D1  | TSSC4   |
| CCDC130                 | PRPF6   |        | C20ORF43                 | PMPCA   | TUBGCP2 |
| CD2BP2                  | PSMC1   |        | CARS                     | PNKP    | UBTF    |
| CHMP1A                  | PSME2   |        | CHMP1A                   | POLL    | UQCRQ   |
| COG4                    | PUF60   |        | COG4                     | POLR1E  | USE1    |
| CORO7                   | RAD23A  |        | CORO7                    | POLR2G  | UXT     |
| DDX49                   | SART1   |        | CPSF3L                   | POP4    | VPS37B  |
| DHX8                    | SCAND1  |        | CTNBL1                   | PPIE    | WDR25   |
| EDC4                    | SEC24C  |        | DDX49                    | PPP4C   | WDR46   |
| EIF3D                   | SF3A3   |        | DHX8                     | PRMT7   | XAB2    |
| EIF3G                   | SF3B2   |        | DNAJB2                   | PRPF19  | YKT6    |
| ERCC1                   | SLC9A8  |        | ECSIT                    | PRPF6   | ZBTB48  |
| FDXR                    | SNF8    |        | EIF3G                    | PSMB1   | ZNF593  |
| FIBP                    | STOML1  |        | EMG1                     | PSMC1   | ZNF768  |
| FIS1                    | SUPT5H  |        | ERCC1                    | PSMC4   |         |
| GNL1                    | TIMM10  |        | FCGRT                    | PSMD13  |         |
| GPAA1                   | TMEM186 |        | FDPS                     | PSME2   |         |
| IDH3B                   | TSSC4   |        | FEN1                     | PTMA    |         |
| ITPA                    | UBTF    |        | FIBP                     | PUF60   |         |
| KLHDC4                  | UQCRQ   |        | GIMAP6                   | RAD23A  |         |
| MCRS1                   | UXT     |        | GNL1                     | RBP1    |         |
| MFSD5                   | VPS33B  |        | GPAA1                    | RFXANK  |         |
| MRPL52                  | VPS37B  |        | IMMT                     | RNF25   |         |
| MRPS18A                 | WDR25   |        | ITPA                     | SART1   |         |
| MYL5                    | WDR46   |        | MCRS1                    | SCAMP3  |         |

## Supplementary Figures

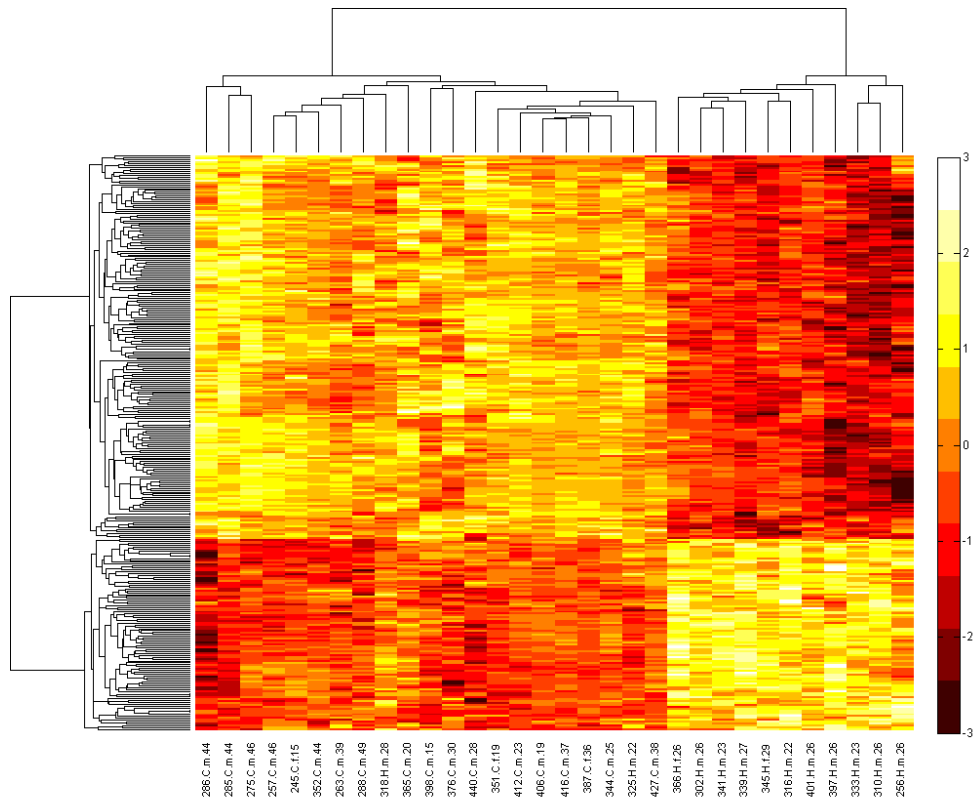

**Figure S1: Heatmap of gene expression changes in the NAc of human heroin abusers.** The hierarchical clustering of differentially expressed genes detected between the control (N=19) and heroin (N=13) groups in the NAc using mRNA microarrays. Dark colors represent normalized low expression and light colors high expression. The x-axis lists subjects represented by a three digit ID number; C-control, H-heroin user; m-male, f-female; age.
